# Supplementary material for: Variations in and environmental controls of primary productivity in the Amundsen Sea
Source: Copernicus journal article supplement (doi:10.5194/bg-2021-296), 2021-11-11
Supplement: Supplementary file 1 [file bg-2021-296-supplement.pdf]

Supporting Information for

**Variations in and environmental controls of primary productivity in the Amundsen Sea**

Jianlong Feng<sup>1</sup>, Delei Li<sup>2,3</sup>, Jing Zhang<sup>1</sup>, Liang Zhao<sup>1\*</sup>

1 Key Laboratory of Marine Resource Chemistry and Food Technology, Tianjin University of Science and Technology, Tianjin 300457, China

2 CAS Key Laboratory of Ocean Circulation and Waves, Institute of Oceanology, Chinese Academy of Sciences, Qingdao, China

3 Center for Ocean Mega-Science, Chinese Academy of Sciences, Qingdao, China \*Corresponding author, College of Marine and Environmental Science, Tianjin University of Science and Technology, Tianjin 300457, PR China. Telephone number: 86-18698004519, Email address: zhaoliang@tust.edu.cn

**Contents of this file**

Figures S1 to S3

**Introduction**

This document provides three supplementary Figures. They are referred in the main text as Figure S1-S3, respectively.

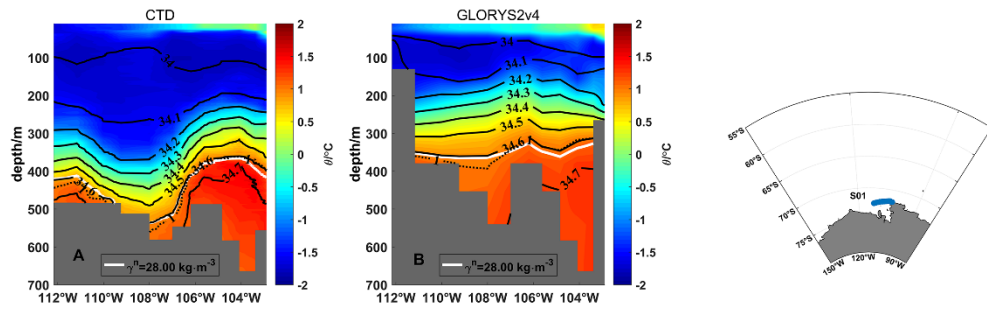

**Figure S1.** Temperature and salinity distribution of the S01 section in 2010.

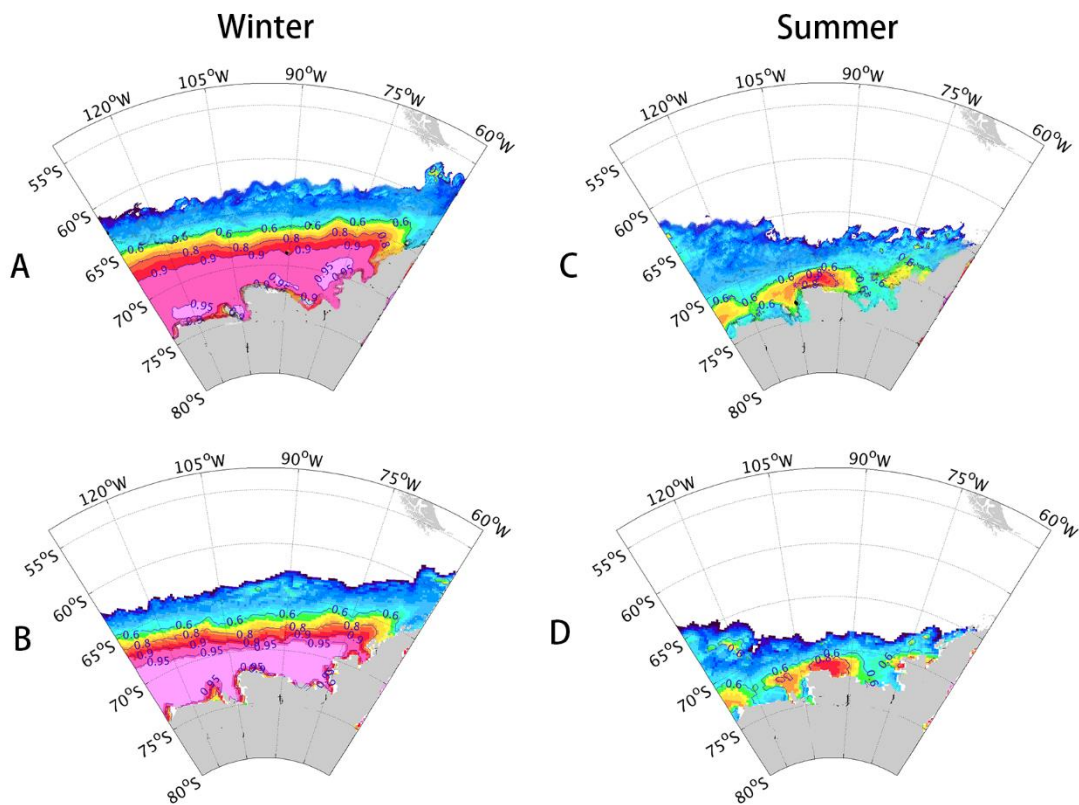

**Figure S2.** Average sea ice concentration in winter (A and B) and summer (C and D) of the Amundsen Sea, GLORYS2v4 (A and C), CDR (B and D).

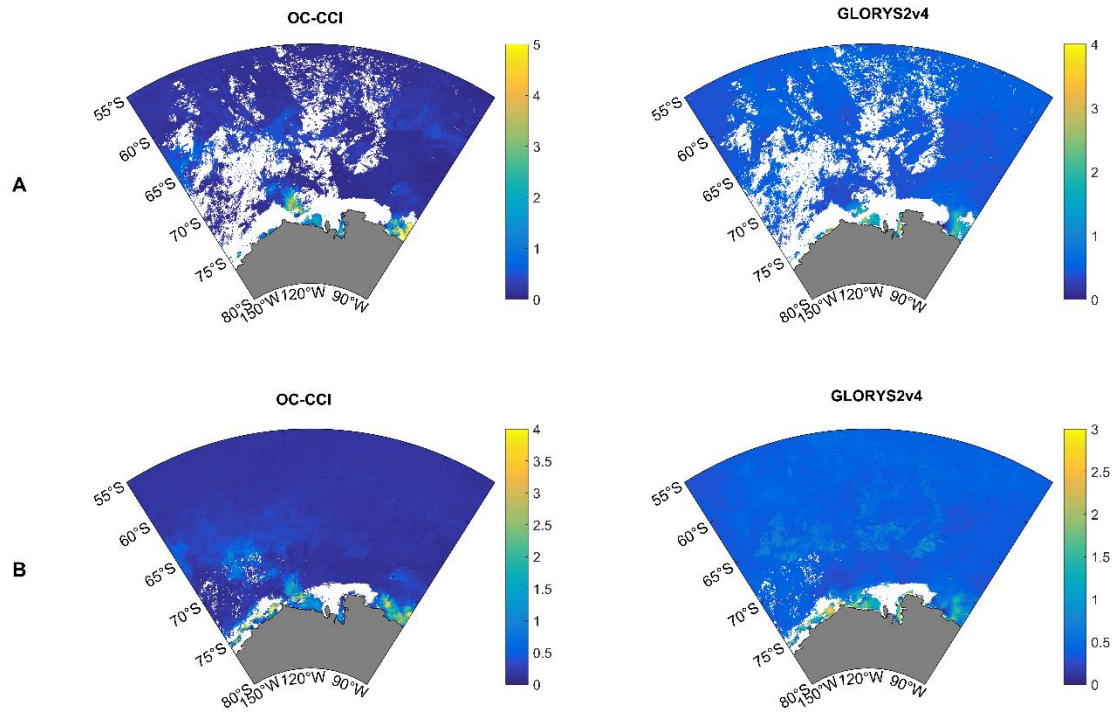

**Figure S3.** Surface chlorophyll concentrations at 201501 (A) and mean value of surface chlorophyll concentrations in 2015 (B) in the Amundsen Sea, OC-CCI (left), GLORYS2v4 (right).
