# Supplementary material for: Variations in and environmental controls of primary productivity in the Amundsen Sea
Source: Copernicus journal article supplement (doi:10.5194/bg-2021-296), 2021-11-11
Supplement: Supplementary file [file bg-2021-296-RC2-supplement.pdf]

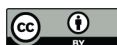

# Variations in and environmental controls of primary productivity in the Amundsen Sea

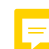

Jianlong Feng<sup>1</sup>, Delei Li<sup>2,3</sup>, Jing Zhang<sup>1</sup>, Liang Zhao<sup>1\*</sup>

<sup>1</sup> Key Laboratory of Marine Resource Chemistry and Food Technology (TUST), Ministry of Education, Tianjin University of Science and Technology, Tianjin 300457, China

<sup>2</sup> CAS Key Laboratory of Ocean Circulation and Waves, Institute of Oceanology, Chinese Academy of Sciences, Qingdao, China

<sup>3</sup> Center for Ocean Mega-Science, Chinese Academy of Sciences, Qingdao, China

\*Corresponding author, Key Laboratory of Marine Resource Chemistry and Food Technology (TUST), Ministry of Education, Tianjin University of Science and Technology, Tianjin 300457, PR China. Telephone number: 86-18698004519, Email address: zhaoliang@tust.edu.cn

**Abstract:** The Amundsen Sea is one of the regions with the highest primary productivity in the Antarctic. To better understand the role of the Southern Ocean in the global carbon cycle and in climate regulation, a better understanding of the variations in and environmental controls of primary productivity is needed. Using cluster analysis, the Amundsen Sea was divided into nine bioregions. The biophysical differences among bioregions enhanced confidence to identify priorities and regions to study the temporal and spatial variations in primary productivity. Four nearshore bioregions with high net primary productivity or rapidly increasing rates were selected to analyze

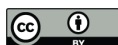

temporal and spatial variations in primary productivity in the Amundsen Sea. Due to changes in net solar radiation and sea ice, primary production had significant seasonal variation in these four bioregions. The phenology had changed at two bioregions (3 and 5), which has the third and fourth highest primary production, due to changes in the dissolved iron, nitrate, phosphate, and silicate concentrations. Annual primary production showed **increasing trends** in these four bioregions. The variation in primary production in the bioregion (9), which has the highest primary production, was mainly affected by variations in sea surface temperatures. In the bioregion, which has the second-highest primary production (~~8~~), the primary production was significantly positively correlated with sea surface temperature and significantly negatively correlated with sea ice thickness. The long-term changes of primary productivity in bioregions 3 and 5 were thought to be related to changes in the dissolved iron, nitrate, phosphate, and silicate concentrations, and dissolved iron was the limiting factor in these two bioregions. Bioregionalization not only disentangle multiple factors that control the spatial differences, but also disentangle limiting factors that affect the phenology, decadal and long-term changes in primary productivity.

**Keywords:** Amundsen Sea; primary productivity; bioregions; dissolved iron

#### **Plain Language Summary**

Although some studies have been conducted on primary productivity in the Amundsen Sea, it is still one of the least studied regions in the Southern Ocean. The spatial differences and mechanisms that drive differences in phenology, decadal and long-term changes in primary productivity are still not clear. In this work, we used

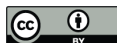

45 bioregionalization to provide a basis for understanding variations in primary  
46 productivity in the Amundsen Sea. Due to changes in the dissolved iron, nitrate,  
47 phosphate, and silicate concentrations, the phenology of primary production had  
48 changed at two bioregions, which has third and fourth highest primary production (3  
49 and 5). Annual primary production showed increasing trends from 1993 to 2015 in 4  
50 near shore bioregions due to changes in SST, sea ice, and dissolved iron. The dissolved  
51 iron was thought to be the limiting factor of long-term change in two bioregions 3 and  
52 5. Bioregionalization was proven to be an effective method to disentangle multiple  
53 limiting factors that affect spatial differences, the phenology, decadal and long-term  
54 changes in primary productivity.

55

## 56 Introduction

57 The Southern Ocean, also known as the Antarctic Ocean, encompasses 10% of the  
58 global ocean and contains parts of the South Pacific Ocean, the South Atlantic Ocean,  
59 the South Indian Ocean, and the marginal seas around Antarctica, such as the Ross Sea,  
60 Weddell Sea, and the Amundsen Sea. The Southern Ocean contains 40% of the total  
61 oceanic inventory of anthropogenic carbon dioxide (Khatiwala et al., 2009), and plays  
62 an important role in Earth's climate regulation, especially by neutralizing the effects of  
63 rising carbon dioxide concentrations and rising global temperatures (Reid et al., 2009;  
64 Ma et al., 2012; Bijma et al., 2013; Petrou et al., 2016). The Amundsen Sea lies between  
65 the Cape Flying Fish and Cape Dart on Slip Island, and is one of the most rapidly

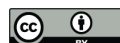

66 warming regions on Earth (Figure 1) (Bromwich et al., 2013), and it is one of the least  
67 studied Antarctic continental shelf regions (Griffiths 2010; Pabis et al., 2014).  
68 Primary productivity plays an important role in the transformation of dissolved  
69 elements in the ocean and in ocean-atmosphere carbon exchange (Amthor and  
70 Baldocchi, 2001). Previous studies have indicated that the phenology, decadal and long-  
71 term changes in primary productivity in the Southern Ocean have been and will  
72 continue to be affected by the current and predicted changes in ocean circulation and  
73 hydrology associated with climate variability (Lannuzel et al., 2007; Herraiz-  
74 Borreguero et al., 2016; Kim and Kim, 2021). Significant spatial differences exist in  
75 the changes in primary productivity in the Southern Ocean, both over large latitudinal  
76 scales and at regional scales (Arrigo et al., 2008; Ardyna et al., 2017). These spatial  
77 differences are related to nutrient availability (mainly iron and possibly nitrate and  
78 silicic acid), temperature, light availability, and mortality factors (Boyd, 2002;  
79 Behernfeld and Boss, 2014; Arrigo et al., 2015). These factors are controlled by vertical  
80 mixing, advection, sea ice cover, and seasonal variations in solar irradiance (Ardyna et  
81 al., 2017). However, studies of the primary productivity of the Southern Ocean have  
82 been limited in their ability to assess spatial variabilities over both short and long  
83 timescales for a variety of different reasons (Arrigo et al., 2008). Primary productivity  
84 also shows significant spatial differences in the Amundsen Sea, the Amundsen Sea  
85 Polynya is the region of particularly high productivity in the Southern Ocean (Arrigo  
86 and van Dijken, 2003; Lee et al., 2012). Although some studies have been conducted  
87 on primary productivity in the Amundsen Sea (Arrigo and van Dijken, 2003; Arrigo et



88 al., 2012; Lee et al., 2012; Park et al., 2017; Lim et al., 2019; Kwon et al., 2021), the  
89 spatial differences and mechanisms that drive differences in phenology, decadal and  
90 long-term changes in primary productivity are still not clear.

91 Bioregionalization is one method used to define ecosystems. Under this approach,  
92 regions are defined based on physical and biological properties, the method can be  
93 defined as the process of delineating the continuous spatial coverage of contiguous  
94 spatial units that support distinct biological assemblages (Costello, 2009; Koubbi et al.,  
95 2011; Roberson et al., 2017). Usually, the spatial units are delineated using geophysical  
96 and biological observation data, modeled data, or a combination of both (Grantham et  
97 al., 2010). The obtained bioregions can be used for monitoring and reporting the state  
98 of the environment, modeling and predicting the effects of climate changes and  
99 identifying priority areas for protection (GREG and Bodtker, 2007; Spalding et al., 2007;  
100 Rice et al., 2011). In recent years, the delimitation of marine bioregions has also been  
101 used to disentangle multiple limiting factors that affect the efficiency of biological  
102 pumps mediated by phytoplankton (Longhurst, 2007; Ardyna et al., 2017), the spatial  
103 and temporal changes of key ecological parameters (Bowman et al., 2018). In the  
104 Southern Ocean, bioregionalization has been widely used to identify representative  
105 areas for protection at broad and regional scales, such as in Southern Ocean (Grant et  
106 al., 2006), Ross Sea region (Sharp et al., 2010), and Weddell Sea (Teschke et al., 2016).

107 Delineating the effects of environmental forcing on temporal and spatial variations in  
108 primary productivity remains challenging and requires novel approaches. We used  
109 bioregionalization to provide a basis for understanding variations in primary



110 productivity in the Amundsen Sea.

111 In this paper, we conducted a cluster analysis using variables from the Global Ocean  
112 Reanalysis and Simulations (GLORYS) dataset to obtain a bioregional map of the  
113 Amundsen Sea. Using the bioregionalization outputs, we analyzed the limiting factors  
114 that affect spatial differences, the phenology, decadal and long-term changes in primary  
115 productivity in the Amundsen Sea.

## 116 2. Data and Methodology

### 117 2.1 Data

118 The physical and ecological variables used in the bioregionalization were derived from  
119 the Global Ocean Reanalysis and Simulation Version 4 (GLORYS2v4) dataset  
120 ([https://resources.marine.copernicus.eu/?option=com\\_csw&task=results&pk\\_vid=f20](https://resources.marine.copernicus.eu/?option=com_csw&task=results&pk_vid=f205f72451b76b161622075614d28a7a)  
121 [5f72451b76b161622075614d28a7a](https://resources.marine.copernicus.eu/?option=com_csw&task=results&pk_vid=f205f72451b76b161622075614d28a7a)). GLORYS2v4 is an ocean reanalysis, which is a  
122 scientific method that produces a comprehensive records of how ocean properties are  
123 changing over time. This reanalysis is performed with NEMOv3.1 ocean model in  
124 configuration ORCA025\_LIM. The vertical grid has 75 levels with partial steps at the  
125 bottom. GLORYS2v4 has assimilated observations, containing delayed time along-  
126 track satellite Sea Level Anomaly, Sea Ice Concentration, Sea Surface Temperature,  
127 and in situ profiles of temperature and salinity from CORA4 database. The monthly  
128 mean values from 1995 to 2015 with a resolution of  $1/4^\circ \times 1/4^\circ$  were used in this work.  
129 *In situ* observed temperature and salinity data were acquired during the ANTXXVI/3  
130 from the research ice breaker Polarstern (Gohl, 2010). The Climate Data Record (CDR)



131 of sea ice concentration from obtained from NSIDC (Meier et al., 2017). Chlorophyll-  
132 a data were obtained from the Ocean Colour Climate Change Initiative (OC-CCI,  
133 <http://www.esa-oceancolour-cci.org>) project.

134 Previous studies have shown that variables obtained from GLORY2v4 perform well  
135 against observations in the Amundsen Sea (Uotlia et al., 2019; Huang et al., 2020). In  
136 this work, we also compare the temperature, salinity, sea ice concentration, and  
137 chlorophyll against observations in the Amundsen Sea (shown in Supplementary Figure  
138 S1-S3). Results showed that comparisons between the GLORYS2v4 and in situ /  
139 satellite measurements of the temperature, salinity, sea ice concentration, and  
140 chlorophyll show a good agreement. Also, the mixed layer depths were calculated  
141 according to Patel (2021) at the S01 section (Figure S1). The mixed layer depths  
142 obtained from the observations ranged from 4 to 24 m with a mean of 15 m. At the same  
143 time, the mixed layer depths obtained from GLORYS2v4 ranged from 5 to 27 m with  
144 a mean of 17m. The above results enhanced the confidence in the quality of the  
145 GLORYS2v4 to get the bioregions in the Amundsen Sea.

146 As variables measured at the ocean surface are strongly correlated with processes at  
147 depth, the surface variables can reflect the properties of the water column (Longhurst,  
148 2007; Oliver and Irwin, 2008). Therefore, the variables of the first layer were used in  
149 this work. The extents of all variables were clipped to match the study area, ranging  
150 from 80 °to 150 °W and 55 °to 80 °S. In addition to total primary production of  
151 phytoplankton (nppv in table 1), other physical and biological variables were also  
152 selected. These variables were selected according to two principles: first, variables



153 selected by other studies conducted in the Southern Ocean were also selected in this  
154 work, including the sea surface temperature (SST), sea surface height (SSH), salinity,  
155 water depth, sea ice persistence index, sea bottom temperature, and chlorophyll (Table  
156 1); second, variables that could affect primary productivity were also selected,  
157 including the mixed layer depth, and dissolved iron (Table 1). The parameters used in  
158 the clustering analysis contained the average states of the variables (mean value across  
159 the time series), their variability (annual maximum mean, annual minimum mean, long-  
160 term change rate), and topographic gradient. The sea ice persistence index was  
161 calculated from the proportion of the overall time during which the grid was covered  
162 by sea ice. All variables were standardized to zero means and unit standard deviations  
163 to eliminate issues associated with units of measurement.

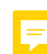

## 164 2.2 Methodology

165 Bioregions were obtained in this work using cluster methods. Cluster analysis is a class  
166 of techniques in which a set of objects or cases classified in the same group (called a  
167 cluster) are more similar to each other than to those in other groups. One advantage of  
168 cluster techniques is that they allow for areas with similar characteristics to be defined  
169 regardless of their location, thereby producing results representative of intrinsic spatial  
170 patterns and environmental variables (Leathwick et al., 2003; Snelder et al., 2007).  
171 Cluster analysis has been commonly used to identify bioregions and is still widely used  
172 today (Milligan and Cooper, 1987; Ebach et al., 2015; Roberson et al., 2017;  
173 Bloomfield et al., 2018). For the Southern Ocean, physical and biological variables,



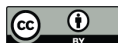

174 including the water temperature, salinity, depth, chlorophyll, and sea-ice information,  
175 were used to obtain the bioregions to facilitate systematic planning for the protection  
176 of marine habitat diversity (Grant et al., 2006; Sharp et al., 2010; Teschke et al., 2016;  
177 Godet et al., 2020). In this work, hierarchical clustering and the *K*-means clustering  
178 method were selected to obtain bioregions in the Amundsen Sea. *K*-means clustering is  
179 a data-mining method that classifies objects into *K* clusters, objects within a given  
180 cluster are more similar to each other (in the multivariate space) than to those in other  
181 clusters. This approach has been successfully applied in the North Atlantic (Lacour et  
182 al., 2015), the Southern Ocean (Ardyna et al., 2017), and the Mediterranean Sea (Mayot  
183 et al., 2016; Palmi  et al., 2018) as well as at the global scale (D’Ortenzio et al., 2012).  
184 The number of *K* categories used for the *K*-means clustering was determined using the  
185 hierarchical clustering method, which depends on the pairwise distances between data  
186 points to merge or divide data into a series of clusters (Fraley and Raftery, 1998).

187

### 188 3. Results and Discussion

#### 189 3.1 Primary productivity in the Amundsen Sea

190 The mean value (Figure 2A) and seasonality amplitude (Figure 2B) of primary  
191 production in the Amundsen Sea were calculated using the data obtained from  
192 GLORYS2V4. The spatial differences were quite significant in the Amundsen Sea, and  
193 the mean primary production values of the Amundsen Sea ranged from 1.5 to 14 mgC  
194 m<sup>-3</sup> day<sup>-1</sup>. In most areas, the mean value was less than 3 mgC m<sup>-3</sup> day<sup>-1</sup>. The primary

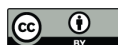

195 production was largest in Pine Island Bay, and minimum values occurred on the two  
196 areas adjacent to of Pine Island Bay, with a mean value of less than  $2 \text{ mgC m}^{-3} \text{ day}^{-1}$ .  
197 This distribution was consistent with other studies about primary production in the  
198 Amundsen Sea (Park et al., 2019). The seasonality amplitude of primary production  
199 (Figure 2B) ranged from 10 to  $100 \text{ mgC m}^{-3} \text{ day}^{-1}$  and showed some similar spatial  
200 characteristics with the mean values, the amplitude was also largest in Pine Island Bay.  
201 However, the spatial variations in the seasonality amplitude were more complicated  
202 than those of the mean value. The seasonality amplitude was not the smallest in the two  
203 areas adjacent to Pine Island Bay, featuring a mean value less than  $2 \text{ mgC m}^{-3} \text{ day}^{-1}$ .  
204 The annual primary production showed an increasing trend from 1993 to 2015 (Figure  
205 2C). The primary production was relatively large from 2000 to 2006; reached a  
206 maximum in 2004, and displayed low values from 1993 to 1996; a minimum occurred  
207 in 1994. Furthermore, the progressive  $UF(t)$  and the retrograde  $UB(t)$  series of the  
208 sequential Mann-Kendall test (Mann, 1945; Kulkarni and von Storch, 1999) were  
209 calculated against time for the annual mean primary production (Figure 2D). The results  
210 showed that primary production featured an increasing trend in general. The positive  
211 trend was significant after 1999, and no mutation existed in the annual primary  
212 production. Primary production exhibited clear seasonal variability (Figure 2E), it  
213 began to increase in August, reached a maximum in December, and began to decrease  
214 after December. From April to September, the primary production was less than  $2 \text{ mgC}$   
215  $\text{m}^{-3} \text{ day}^{-1}$ . The monthly primary production varied greatly in the summer months, and  
216 the amplitude was largest in December (ranging from 4.5 to  $14.5 \text{ mgC m}^{-3} \text{ day}^{-1}$ ). Above

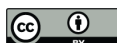

217 results were in consistent with previous studies using observations (Arrigo and van  
 218 Dijken, 2003; Park et al., 2017; Lim et al., 2019; Kwon et al., 2021), and enhanced the  
 219 confidence in the data quality and in the analysis.

220

### 221 3.2 Bioregion classification and characterization

222 To obtain the number of clusters ( $K$ ), hierarchical clustering was carried out in the  
 223 Amundsen Sea. The dendrogram obtained from the hierarchical clustering algorithm  
 224 was used to guide the clustering process (Figure 3). Norse (2010) indicated that if  $K$  is  
 225 too large, important details are overlooked; if  $K$  is too small, the result is an  
 226 unmanageable number of decision-making groups. To obtain a more reasonable result,  
 227  $K$ -means cluster analyses were carried out twice ( $K=6$  and  $K=9$ ) (Figure 4). The results  
 228 (Figure 4) show that spatial distribution had similar characteristics between the  $K=6$   
 229 and  $K=9$  results. But differences also existed, when  $K=9$  was selected, the coastal area  
 230 was divided into 2 bioregions (9-8 and 9-9). When  $K=6$  was selected, the coastal area  
 231 was divided into 1 bioregion (6-6). The northern boundary area was divided into two  
 232 bioregions (6-2 and 6-3) when  $K=6$ , while it was divided into three bioregions (9-4, 9-  
 233 6, and 9-7) when  $K=9$ . When  $K=6$ , the central region was divided into two bioregions  
 234 (6-1 and 6-2), and when  $K=9$ , the central region was divided into three bioregions (9-1,  
 235 9-2, and 9-3). For comparison, the mean values of the variables in different bioregions  
 236 were calculated (6-6, 9-8 and 9-9; 6-3, 9-4, and 9-7) (Table 2). The results showed that  
 237 the differences in the physical variables were small among bioregions 6-6, 9-8, and 9-



238 9, while the differences in the biological variables were quite pronounced. The mean  
239 values of *chl* and *nppv* were significantly smaller in the 9-8 bioregion than those in the  
240 6-6 and 9-9 bioregions. The differences in biological variables among bioregions 6-3,  
241 9-4, and 9-7 were small, while the differences in physical variables were quite clear,  
242 especially the *mlp*, *ssh*, and *fice* variables. The above results indicated that the  
243 bioregions obtained from  $K=9$  can describe the detailed differences in *fice*, *mlp*, *chl* and  
244 *nppv* more clearly than the bioregions obtained from  $K=6$ . All these variables are  
245 important in a spatial analysis of primary production in the Amundsen Sea; therefore,  
246 we ultimately selected the resulting bioregions when  $K=9$ .

247 The parameters that characterize the key properties of each bioregion differed among  
248 the bioregions (Figure 5). Here, we listed four levels of each parameter to help  
249 characterize each bioregion relative to the study area: the maximum value, the second-  
250 highest value, the minimum value, and the second-lowest value. Bioregions 8 and 9 are  
251 associated with the continental shelf and slope edge down to approximately 300 m. The  
252 Amundsen Sea Polynya is located in this region (Swalethorp et al., 2019), and these  
253 two bioregions are the areas through which the coastal current flows in the Amundsen  
254 Sea (Kim et al., 2016). Bioregions 8 and 9 showed some similar features; they were  
255 both distinguished by low *tem*, low *mlp*, low *sal*, high *chl*, high *nppv*, high *fe*, and low  
256 *dep* values. There were also some differences between bioregions 8 and 9; bioregion 9  
257 had the lowest *bot* value, while bioregion 8 had the second-highest *bot* value. The *fice*  
258 values of bioregion 8 were higher than those of bioregion 9, the *tem* values of bioregion  
259 8 were lower than those of bioregion 9, bioregion 9 had the second-highest longitudinal



260 gradient, and bioregion 8 had the second-lowest latitudinal gradient. Although  
261 bioregion 8 had the second-highest *nppv* value, the *nppv* value of bioregion 9 (8.51  
262  $\text{mgC m}^{-3} \text{ day}^{-1}$ ) was much higher than that of bioregion 8 ( $5.86 \text{ mgC m}^{-3} \text{ day}^{-1}$ ).  
263 Bioregion 5 was located within the continental slope, and its boundary was mostly  
264 consistent with the Antarctic Slope Front (Martinson, 2012). Bioregion 5 was  
265 distinguished by the lowest *tem*, lowest *mlp*, second-lowest *ssh*, highest *bot*, highest  
266 *fice*, lowest *chl*, and lowest *nppv*, *vaules* and the lowest latitudinal gradient and highest  
267 longitudinal gradient. In this bioregion, Circumpolar Deep Water (CDW) intrudes onto  
268 the shelf, after which it mixes with surrounding water and masses to become Modified  
269 Circumpolar Deep Water (MCDW) (Arneborg et al., 2012; Stalaurent et al., 2017).  
270 MCDW is a potential source of dissolved iron fueling primary productivity in  
271 bioregions 8 and 9 (St-Laurent et al., 2017; Dinniman et al., 2020).  
272 Bioregions 1, 2, 3, 4, 6, and 7 were located in the abyssal plain. Bioregion 3 was  
273 distinguished by the second-lowest *mlp*, the lowest *ssh* and the second-lowest *chl* and  
274 *nppv* values. Bioregion 3 was therefore assumed to be closely associated with the Ross  
275 Gyre (Dotto et al., 2018). The Ross Gyre is formed by the interaction between the  
276 Antarctic Circumpolar Current and the Antarctic Continental Shelf and rotates  
277 clockwise. The northern boundary of bioregion 1 mostly consisted of winter sea ice  
278 (Comiso et al., 2003). Bioregion 2 was distinguished by the second-lowest *bot*, the  
279 second-lowest *fe*, and the second-lowest annual maximum *chl* values. The sea ice of  
280 bioregion 2 decreased from 1993 to 2015, and the rate of sea ice decrease was the largest  
281 in bioregion 2 among all bioregions. Bioregions 4, 6, and 7 were located at the northern



282 boundary of the study region, and these bioregions are the areas through which  
283 Antarctic Circumpolar Current flows. Bioregion 6 was distinguished by the highest *tem*,  
284 the highest *mlp*, the highest *ssh*, the lowest *fice*, the highest *sal* and the lowest *dep* values.  
285 Bioregion 4 was distinguished by the second-highest *tem*, the second-highest *mlp*, the  
286 second-highest *ssh*, the second-lowest *fice*, the second-highest *sal*, and the second-  
287 lowest *dep* values. Bioregion 7 was distinguished by the lowest *fe* value the lowest  
288 longitudinal gradient, and the lowest long-term change rate of *tem*.  
289 The above results indicated that the bioregions differed in their physical and biological  
290 characteristics (including primary productivity). These bioregions can be used to study  
291 the temporal and spatial variations in primary productivity in the Amundsen Sea.  
292 Furthermore, the 9 bioregions had biophysical significance; therefore, they are also  
293 useful for systematic conservation planning of marine protected areas (MPAs) in the  
294 Amundsen Sea (Fraschetti et al., 2008; Trembl and Halpin, 2012).

295

### 296 **3.3 Variations in primary productivity**

297 In the Amundsen Sea, intense phytoplankton blooms occasionally develop, making  
298 primary productivity highly variable both temporally and spatially (Moore and Abbott,  
299 2000; Arrigo et al., 2008) (Figure 2B). Our results outlined in section 3.2 indicated that  
300 the 9 obtained bioregions can be used to reflect the temporal differences in primary  
301 productivity in the Amundsen Sea. The mean value, annual maximum mean, and long-  
302 term change rate of primary production were calculated in the 9 bioregions and are



303 shown in Figure 6. The results showed that the mean and annual maximum mean values  
304 of primary production in bioregions 8 and 9 were significantly larger than those in other  
305 bioregions. This is because the polynyas in the Amundsen Sea are located in bioregion  
306 8 and 9. The long-term change rate of bioregion 9 was the largest, followed by those of  
307 bioregions 3 and 5. Therefore, bioregions 3, 5, 8, and 9 were selected as typical  
308 bioregions with which to analyze variations in primary productivity in the Amundsen  
309 Sea.

310 Primary productivity exhibited clear seasonal variability in these four bioregions  
311 (Figure 7). The primary production was large from November to March, and the  
312 monthly variations were more significant in bioregions 8 and 9 than in the other  
313 bioregions. From April to October, the differences among these 4 bioregions became  
314 small, and primary production in these 4 bioregions was less than  $1 \text{ mgC m}^{-3} \text{ day}^{-1}$ .  
315 Seasonal variations in primary productivity in the Amundsen Sea were mainly caused  
316 by changes in net solar radiation, sea ice, and iron (Moore and Abbott, 2000;  
317 Stammerjohn et al., 2015; Wu and Hou, 2017; St-Laurent et al., 2019). In the Amundsen  
318 Sea, the sea ice coverage increased after March and reached a maximum value in austral  
319 winter (Figure 8). After September, the sea ice coverage decreased and reached a  
320 minimum value in austral summer. The production of meltwater, the generation of a  
321 stratified surface layer, and the release of biogenic elements (such as iron) increased  
322 phytoplankton growth and accumulation within the marginal ice zone (Ritterhoff and  
323 Zauke, 1997; Smith Jr and Comiso, 2008; St-Laurent et al., 2019). The net solar  
324 radiation of the Southern Ocean has significant seasonal variations and is higher in



325 spring (September to November) and summer (December to February) and lower in  
326 autumn (March to May) and winter (June to August). At the same time, sea ice coverage  
327 can regulate the availability of irradiance to phytoplankton in the Amundsen Sea. Under  
328 the effects of polar night and large sea ice coverage, the primary production was close  
329 to 0 from May to September in these four bioregions. Results also showed that the  
330 dissolved iron also exhibited clear seasonal variability. The iron reached a maximum in  
331 November, and then decreased, it reached its minimum in February (Figure 8). Previous  
332 studies of the coastal polynya also found that the phytoplankton bloom is primarily  
333 light-limited in its early stages, but as the pool of dissolved iron is depleted by  
334 phytoplankton uptake, there is a transition towards iron limitation (St-Laurent et al.,  
335 2019; Twelves et al., 2020).

336 The results also showed that the phenology changed over the study period in bioregions  
337 3 and 5 (Figure 9). In bioregion 3, primary production reached a maximum in January  
338 before 1998, while after 1998, maximum primary production occurred in December. In  
339 bioregion 3, the primary production rates in November and December increased  
340 significantly after 1998. In bioregion 5, primary production reached its maximum in  
341 January before 2001; after 2001, the maximum primary production occurred in  
342 December. In bioregion 5, primary production increased significantly in November and  
343 December after 2001. These variations in primary production in bioregions 3 and 5  
344 were thought to be related to the changes in iron, nitrate, phosphate, and silicate (Figure  
345 10). The melting of the ice shelf increases iron availability due to the meltwater pump  
346 effect and due to the release of iron entrained at the glacier bed (Twelves et al., 2021).





347 In bioregion 3, the dissolved iron concentrations increased significantly in November  
348 and December after 1998; these increased values were more than 2 times higher than  
349 those recorded before 1998. Alderkamp et al. (2015) indicated that primary productivity  
350 would be stressed by low iron concentrations during December and January in the  
351 Amundsen Sea. Increased dissolved iron concentrations resulted in increased primary  
352 production in November and December after 1998. In bioregion 5, the dissolved iron  
353 concentrations also increased in November and December after 1998, and the nitrate,  
354 phosphate, and silicate concentrations increased significantly in November and  
355 December after 2000. The changes in dissolved iron, nitrate, phosphate, and silicate  
356 resulted in increased primary production in November and December after 2000. Kwon  
357 et al. (2021) also found that the increase in iron can lead to a shift in the bloom peak  
358 timing to earlier than January in the Amundsen Sea continental shelf water (mostly in  
359 bioregion 5) using a 1-D pelagic ecosystem model.

360 The changes in primary production from 1993 to 2015 in bioregions 3, 5, 8, and 9 were  
361 also analyzed (Figure 11). The results showed that primary production showed positive  
362 linear trends in these four bioregions, and these trends were significant at the 95%  
363 confidence level in bioregions 3, 5, and 9. Bioregion 9 had the fastest growth rate, and  
364 the decadal variations in bioregion 9 were also larger than those in the other 3  
365 bioregions. Primary production reached highest in 2006 and was relatively low in 1994,  
366 1999, 2000, and 2015. The increasing trend observed in bioregion 8 was not significant,  
367 but the interannual variations were more significant in bioregion 8 than those in  
368 bioregions 3 or 5. The interannual and decadal variations between bioregion 8 and



369 bioregion 9 were quite similar, with a correlation coefficient of approximately 0.75  
370 (calculated using the time series after long-term trend removal). In bioregion 9, a  
371 significant positive correlation existed between primary production and sea surface  
372 temperatures in summer (from November to March), and the correlation coefficient was  
373 0.46. In bioregion 8, the interannual and decadal variations in primary production were  
374 positively correlated with the sea surface temperature in summer, and the correlation  
375 coefficient was 0.45. These variations in primary production were also significantly  
376 negatively correlated with sea ice thickness, and the correlation coefficient was -0.54.  
377 Therefore, the changes in primary production recorded in bioregions 8 and 9 may have  
378 been caused by changes in the sea surface temperatures in summer in these areas.  
379 Previous studies have shown that SSTs can impact rates of products directly through  
380 the relationship between temperature and phytoplankton metabolic rate; SSTs can also  
381 affect surface ocean stratification and sea ice distributions (Arrigo et al., 2008). The  
382 decline in sea ice thickness can increase the light availability, which has significant  
383 effects on the blooms in the nearshore and coastal polynyas in the Amundsen Sea  
384 (Venables et al., 2013; Schofield et al., 2015; Oliver et al., 2019; St-Lauernt et al., 2018).  
385 The growth rate of primary production in bioregion 3 was larger than that in bioregions  
386 5 and 8. This primary production rise accelerated before 2000, while after 2000, no  
387 significant long-term change was observed in bioregion 3. Primary production rose with  
388 fluctuations in bioregion 5 and reached a maximum in 2005. The decadal and long-term  
389 changes in primary production recorded in bioregions 3 and 5 were thought to be related  
390 to changes in dissolved iron. The correlation coefficients between primary production



391 and dissolved iron were 0.96 in bioregion 3 and 0.59 in bioregion 5, indicating that  
392 dissolved iron was an important factor limiting primary productivity. The dissolved iron  
393 concentrations in bioregions 8 and 9 were the highest in the Amundsen Sea area (Figure  
394 5), so dissolved iron was not the limiting factor for primary productivity in these two  
395 bioregions. The spatial differences in the limitation of dissolved iron on the primary  
396 productivity of the Amundsen Sea were consistent with previous results (Gerringa et  
397 al., 2012; Yager et al., 2012; Alderkamp et al., 2015). We also found that the primary  
398 production was significantly positively correlated with nitrate, phosphate, and silicate  
399 in bioregions 3 and 5. The correlation coefficients were all larger than 0.6 in bioregions  
400 3 and 5. The changes in nitrate, phosphate, and silicate may have also contributed to  
401 the observed decadal and long-term changes in primary productivity. However, the  
402 Southern Ocean is the largest high-nutrient region (Lee et al., 2012). And the  
403 differences in nitrate, phosphate, and silicate were quite small among these four  
404 bioregions. So compared with bioregion 8 and 9, the nitrate, phosphate, and silicate  
405 were not thought to be limiting factors of primary productivity in bioregions 3 or 5.

406

#### 407 4. Conclusion

408 The Amundsen Sea is one of the least-studied regions in the Southern Ocean and has  
409 significant spatial differences in primary productivity. In this work, we used  
410 bioregionalization to provide a basis for understanding the temporal and spatial  
411 variations in primary productivity in the Amundsen Sea.

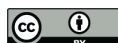

412 The spatial differences were quite significant in the Amundsen Sea; in most areas, the  
413 mean primary production was less than  $3 \text{ mgC m}^{-3} \text{ day}^{-1}$ . However, near the coast of  
414 Pine Island Bay, mean primary production reached  $14 \text{ mgC m}^{-3} \text{ day}^{-1}$ . The annual mean  
415 primary production showed an increasing trend from 2013 to 2015. Primary production  
416 exhibited clear seasonal variabilities and was largest in December at approximately 10  
417  $\text{mgC m}^{-3} \text{ day}^{-1}$ .

418 A pelagic bioregional map of the Amundsen Sea was obtained using cluster analysis.  
419 The Amundsen Sea was divided into 9 bioregions using hierarchical clustering and the  
420 *K*-means clustering method. The key properties of bioregions were characterized using  
421 different parameters. All bioregions had biophysical significance and could reflect  
422 spatial differences in physical and ecological characteristics, such as the topography,  
423 currents, upwelling, and Ross Gyre. Furthermore, the obtained bioregions could also be  
424 used for systematic conservation planning of marine protected areas (MPAs) in the  
425 Amundsen Sea.

426 Bioregions 3, 5, 8, and 9 were selected to analyze variations in primary productivity in  
427 the Amundsen Sea. The phenology changed in bioregions 3 and 5, and these changes  
428 were thought to be related to changes in dissolved iron, nitrate, phosphate, and silicate.  
429 Primary production showed positive linear trends in these four bioregions. Bioregion 9  
430 had the fastest growth rate, and this trend was significantly positively correlated with  
431 changes in the summer sea surface temperatures. In bioregion 8, the interannual and  
432 decadal variations in primary production were also positively correlated with the sea  
433 surface temperatures in summer. The long-term primary changes recorded in bioregions



434 3 and 5 were thought to be related to changes in the dissolved iron concentrations,  
435 indicating that dissolved iron was the limiting factor for primary productivity in these  
436 two bioregions.

437 Above results indicated that in addition to be used in the systematic conservation  
438 planning of marine protected areas, bioregionalization is also an effective method to  
439 disentangle multiple limiting factors that affect spatial differences, the phenology,  
440 decadal and long-term changes in the physical and ecological variables, such as the  
441 primary productivity.

#### 442 **Data availability**

443 The Global Ocean Reanalysis and Simulation Version 4 (GLORYS2v4) dataset can be  
444 accessed from  
445 [https://resources.marine.copernicus.eu/?option=com\\_csw&task=results&pk\\_vid=f205f72451b76](https://resources.marine.copernicus.eu/?option=com_csw&task=results&pk_vid=f205f72451b76b161622075614d28a7a)  
446 [b161622075614d28a7a](https://resources.marine.copernicus.eu/?option=com_csw&task=results&pk_vid=f205f72451b76b161622075614d28a7a).

#### 447 **Author contributions**

448 JF wrote the first version of the manuscript, DL performed addition analyses, JZ made  
449 figures, and LZ revised the text.

#### 450 **Competing interests**

451 The authors declare that they have no conflict of interest.

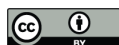

452    **Acknowledgment**

453    This study was supported by impact and response of Antarctic seas to climate change  
454    under contract RFSOCC2020-2022-No.18, and National Science Foundation of Tianjin  
455    (19JCZDJC40600).

456

457    **References**

- 458    Alderkamp, A. C., van Dijken, G. L., Lowry, K. E., Connelly, T. L., Lagerström, M.,  
459    Sherrell, R. M., Haskins, C., Rogalsky, E., Schofield, O., Stammerjohn, S. E., Yager, P.  
460    L., Arrigo, K. R. 2015. Fe availability drives phytoplankton photosynthesis rates during  
461    spring bloom in the Amundsen Sea Polynya, Antarctica. *Elementa: Science of the*  
462    *Anthropocene*, 3: 000043
- 463    Amthor, J. S., Baldocchi, D. D. 2001. Terrestrial Higher Plant Respiration and Net  
464    Primary Production. In *Terrestrial Global Productivity*, Academic Press, 33-59
- 465    Ardyna, M., Claustre, H., Sallée, J. B., D'Ovidio, F., Gentili, B., van Dijken, G.,  
466    D'Ortenzio, F., Arrigo, K. R. 2017. Delineating environmental control of phytoplankton  
467    biomass and phenology in the Southern Ocean. *Geophysical Research Letters*, 44,  
468    5016-5024.
- 469    Arneborg, L., Wåhlin, A. K., Björk, G., Lijebldh, B., Orsi, A. H. 2012. Persistent  
470    inflow of warm water onto the central Amundsen shelf. *Nature Geoscience*, 5(12):  
471    876–880
- 472    Arrigo, K. R., van Dijken, G. L. 2003. Phytoplankton dynamics within 37 Antarctic

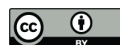

473 coastal polynya systems. *J. Geophys. Res.* 108:C83271. doi:10.1029/2002JC001739

474 Arrigo, K. R., van Dijken, G. L., Bushinsky, S. 2008. Primary production in the

475 Southern Ocean, 1997-2006. *Journal of Geophysical Research*, 113, C08004

476 Arrigo, K. R., Lowry, K. E., van Dijken, G. L. 2012. Annual changes in sea ice and

477 phytoplankton in polynyas of the Amundsen Sea, Antarctica. *Deep Sea Research Part*

478 *II: Topical Studies in Oceanography*, 71-76, 5-15.

479 Arrigo, K. R., van Dijken, G. L., Strong, A. L. 2015. Environmental controls of marine

480 productivity hot spots around Antarctica. *Journal of Geophysical Research: Oceans*,

481 120(8), 5545-5565.

482 Behrenfeld, M., and E. Boss (2014), Resurrecting the ecological underpinnings of

483 ocean plankton blooms, *Annu. Rev. Mar. Sci.*, 6, 167–194.

484 Bijma, J., Pörtner, H. O., Yesson, C., Rogers, A. D. 2013. Climate change and the

485 oceans – what does the future hold? *Marine Pollution Bulletin*, 74(2): 495-505.

486 Bloomfield, N. J., Knerr, N., Encinas-Viso, F. (2018). A comparison of network and

487 clustering methods to detect biogeographical regions. *Ecography*, 41, 1-10.

488 Bowman, J. S., Kavanaugh, M. T., Donsy, S. C., Ducklow, H. W. (2018). Recurrent

489 seascape units identify key ecological processes along the western Antarctic Peninsula.

490 *Global Change Biology*, 24(7), 3065-3078.

491 Boyd, P. W. (2002), Environmental factors controlling phytoplankton processes in the

492 Southern Ocean, *J. Phycol.*, 38(5), 844–861

493 Bromwich, D. H., Nicolas, J. P., Monaghan, A. J., Lazzara, M. A., Keller, L. M.,

494 Weidner, G. A., Wilson, A. B. 2013. Central West Antarctica among the most rapidly



495 warming regions on Earth. *Nature Geoscience*, 6, 139–145

496 Comiso, J. C., Cavalieri, D. J., Markus, T. 2003. Sea ice concentration, ice temperature,  
 497 and snow depth using AMSR-E data. *IEEE Transactions on Geoscience & Remote*  
 498 *Sensing*, 41(2): 243–252.

499 Costello, M.J. 2009. Distinguishing marine habitat classification concepts for  
 500 ecological data management. *Mar. Ecol. Prog. Ser.* 397, 253e268. [http://](http://dx.doi.org/10.3354/meps08317)  
 501 [dx.doi.org/10.3354/meps08317](http://dx.doi.org/10.3354/meps08317)

502 D’Ortenzio, F., and M. Ribera d’Alcalà (2009), On the trophic regimes of the  
 503 Mediterranean Sea: A satellite analysis, *Biogeosciences*, 6(2),139–148.

504 Dotto, T. S., Garabato, A. N., Bacon, S., Tsamados, M., Holland, P. R., Hooley, J.,  
 505 Frajka-Williams, E., Ridout, A., Meredith, M. P. 2018. Variability of the Ross Gyre,  
 506 Southern Ocean: drivers and responses revealed by satellite altimetry. *Geophysical*  
 507 *Research Letters*, 45(12): 6195–6201

508 Ebach, M. C., Murphy, D. J., Gonzalez-Orozco, C., Miller, J. 2015. A revised area  
 509 taxonomy of phytogeographical regions within the Australian bioregionalisation atlas.  
 510 *Phytotaxa*, 208(4), 261–277.

511 Fraley, C., Raftery, A. 1998. How many clusters? Which clustering method? Answers  
 512 via model-based cluster analysis. *The Computer Journal*, 41: 578–588.

513 Frascetti, S., Terlizzi, A., Boero, F. 2008. How many habitats are there in the sea (and  
 514 where)? *J. Exp. Mar. Bio. Ecol.* 366, 109e115. [http://dx.doi.org/10.1016/](http://dx.doi.org/10.1016/j.jembe.2008.07.015)  
 515 [j.jembe.2008.07.015](http://dx.doi.org/10.1016/j.jembe.2008.07.015)

516 Gerringa, L. J. A., Alderkamp, A. C., Laan, P., Thuróczy, C. E., De Baar, H. J. W., Mills,





517 M. W., van Dijken, G. L., van Haren, H., Arrigo, K. R. 2012. Iron from melting glaciers  
 518 fuels the phytoplankton blooms in Amundsen Sea (Southern Ocean); iron  
 519 biogeochemistry. *Deep-Sea Res Pt II*, 71–76: 16–31.

520 Godet, C., Robuchon, M., Leroy, B., Cotté C., Baudena, A., Silva, O. D., Fabri-Ruiz,  
 521 S., Monaco, C. L., Sergi, S., Koubbi, P. 2020. Matching zooplankton abundance and  
 522 environment in the South Indian Ocean and Southern Ocean. *Deep Sea Research Part*  
 523 *I: Oceanographic Research Papers*. 163, 103347

524 Gohl, K. 2010. The expedition of the Research Vessel Polarstern to the Amundsen Sea,  
 525 Antarctica, in 2010 (ANT-XXIV/3). *Rep. Polar Mar. Res.*, 617, 173.

526 Grant, S., Constable, A., Raymond, B., Doust, S. 2006. Bioregionalisation of the  
 527 Southern Ocean. Report of an expert workshop, Hobart, Australia, September 2006.  
 528 World Wildlife Fund–Australia and Antarctic Climate and Ecosystems Cooperative  
 529 Research Centre, 2006.

530 Grantham, H.S., Pressey, R.L., Wells, J.A., Beattie, A.J. 2010. Effectiveness of  
 531 biodiversity surrogates for conservation planning: different measures of effectiveness  
 532 generate a kaleidoscope of variation. *PLoS One* 5. [http://dx.doi.org/10.1371/](http://dx.doi.org/10.1371/journal.pone.0011430)  
 533 [journal.pone.0011430](http://dx.doi.org/10.1371/journal.pone.0011430)

534 Greger, E. J., Bodtker, K. M. 2007. Adaptive classification of marine ecosystems:  
 535 Identifying biological meaningful regions in the marine environment. *Deep-Sea*  
 536 *Research I*, 54, 385–402.

537 Griffiths H.J. 2010. Antarctic marine biodiversity—what do we know about the  
 538 distribution of life in the Southern Ocean?. *PLoS One* 5, e11683



- 539 Herraiz-Borreguero, L., Lannuzel, D., van der Merwe, P., Treverrow, A., Pedro, J. B.  
540 2016. Large flux of iron from the Amery Ice Shelf marine ice to Prydz Bay, East  
541 Antarctica. *J. Geophys. Res. Oceans*, 121, 6009–6020, doi:10.1002/2016JC011687.
- 542 Huang, J., Zhang, Z., Wang, X. 2020. Evaluation of four high-resolution sea ice  
543 reanalysis products in the Ross Sea and Amundsen Sea. *Chinese Journal of Polar*  
544 *Research*, 32(4), 452-468 (In Chinese with English abstract)
- 545 Khatiwala, S., F. Primeau, and T. Hall (2009), Reconstruction of the history of  
546 anthropogenic CO<sub>2</sub> concentrations in the ocean, *Nature*, 462 (7271), 346–349.
- 547 Kim, C. S., Kim, T. W., Cho, K. H., Ha, H. K., Lee, S. H., Kim, H. C., Lee, J. H. 2016.  
548 Variability of the Antarctic coastal current in the Amundsen Sea. *Estuarine, Coastal and*  
549 *Shelf Science*, 181(5), 123-133.
- 550 Kim, S. U., Kim, K. Y. 2021. Impact of climate change on the primary production and  
551 related biogeochemical cycles in the coastal and sea ice zone of the Southern Ocean.  
552 *Science of The Total Environment*, 751, 141678.
- 553 Koubbi, P., Moteki, M., Duhamel, G., Goarant, A., Hulley, P.A., O'Driscoll, R.,  
554 Ishimaru, T., Pruvost, P., Tavernier, E., Hosie, G., 2011. Ecoregionalization of  
555 myctophid fish in the Indian sector of the Southern Ocean: results from generalized  
556 dissimilarity models. *Deep. Res. Part II Top. Stud. Oceanogr.* 58, 170e180.  
557 <http://dx.doi.org/10.1016/j.dsr2.2010.09.007>
- 558 Kulkarni, A.; von Storch, H. 1995. Monte Carlo experiments on the effect of serial  
559 correlation on the Mann-Kendall-test of trends. *Meteor Z.* 4, 82–85
- 560 Kwon, Y. S., La, H. S., Jung, J., Lee, S. H., Kim, T. W., Kang, H. W., & Lee, S. H.

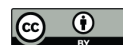

561 (2021). Exploring the Roles of Iron and Irradiance in Dynamics of Diatoms and  
562 Phaeocystis in the Amundsen Sea Continental Shelf Water. *Journal of Geophysical*  
563 *Research: Oceans*, 126(3), 1-23.

564 Lacour, L., H. Claustre, L. Prieur, and F. D'Ortenzio (2015), Phytoplankton biomass  
565 cycles in the North Atlantic subpolar gyre: A similar mechanism for two different  
566 blooms in the Labrador Sea, *Geophys. Res. Lett.*, 42, 5403–5410,  
567 doi:10.1002/2015GL064540.

568 Lannuzel, D., Schoemann, V., De Jong, J., Tison, J. L., Chou, L. 2007. Distribution and  
569 biogeochemical behaviour of iron in the East Ant-arctic sea ice. *Mar. Chem.*, 106(1),  
570 18–32.

571 Leathwick, J. R., Overton, J., McLeod, M. 2003. An environmental domain  
572 classification of New Zealand and its use as a tool for biodiversity management.  
573 *Conservation Biology* 17: 1612–1623.

574 Lee, S. H., Kim, B. K., Yun, M. S., Joo, H., Yang, E. J., Kim, Y. N., Shin, H. C., Lee, S.  
575 2012. Spatial distribution of phytoplankton productivity in the Amundsen Sea,  
576 Antarctica. *Polar Biology*, 35, 1721-1733.

577 Lim, Y. J., Kim, T. W., Lee, S., Lee, D., Park, J., Kim, B. K., Kim, K., Jang, H. K.,  
578 Bhavya, P. S., Lee, S. H. 2019. Seasonal variations in the small phytoplankton  
579 contribution to the total primary production in the Amundsen Sea, Antarctica. *Journal*  
580 *of Geophysical Research, Oceans*. 124(11), 8324-8341.

581 Longhurst, A. (2007), *Ecological Geography of the Sea*, 2nd ed., p. 542, Academic  
582 Press, Burlington, Mass.



- 583 Ma, H., Wang, Z., Shi, J. 2012. The Role of the Southern Ocean Physical Processes in  
584 Global Climate System. *Advances in Earth Science*, 27(4): 398-412.
- 585 Mann, H. B. 1945. Nonparametric tests against trend. *Econometrica*, 13, 245-259.
- 586 Martinson, D. G. 2012. Antarctic circumpolar current's role in the Antarctic ice system:  
587 An overview. *Palaeogeography, Palaeoclimatology, Palaeoecology*, 335-336: 71–74
- 588 Mayot, N., F. D’Ortenzio, M. Ribera d’Alcalà, H. Lavigne, and H. Claustre (2016),  
589 Interannual variability of the Mediterranean trophic regimes from ocean color satellites,  
590 *Biogeosciences*, 13(6), 1901–1917.
- 591 Meier, W. N., Fetterer, F., Savoie, M., Mallory, S., Duerr, R., Stroeve, J. 2017.  
592 NOAA/NSIDC Climate Data Record of Passive Microwave Sea Ice Concentration,  
593 Version 3. Boulder, Colorado USA. NSIDC: National Snow and Ice Data Center. doi:  
594 <https://doi.org/10.7265/N59P2ZTG>.
- 595 Milligan, G. W., Cooper, M. C. 1987. Methodology review: clustering methods. – *Appl.*  
596 *Psychol. Meas.* 11: 329–354.
- 597 Moore, J. K., Abbott, M. R. 2000. Phytoplankton chlorophyll distributions and primary  
598 production in the Southern Ocean, *J. Geophys. Res.*, 105(C12), 28, 709-722,  
599 doi:10.1029/1999JC000043.
- 600 Oliver, M. J., Irwin, A. J. 2008. Objective global ocean biogeographic provinces.  
601 *Geophys. Res. Lett.* 35, L15601
- 602 Oliver, H., St - Laurent, P., Sherrell, R. M., Yager, P. L. 2019. Modeling Iron and Light  
603 Controls on the Summer *Phaeocystis antarctica* Bloom in the Amundsen Sea Polynya.  
604 *Global Biogeochemical Cycles*, 33(5), 570-596.



- 605 Pabis, K., Błażewicz, M., Józwiak, P., Barnes, D. K.A. 2015. Tanaidacea of the  
606 Amundsen and Scotia Seas: an unexplored diversity. *Antarctic Science*, 27(1):19-30.
- 607 Palmiéri, J., Dutay, J. C., D’Ortenzio, F., Houpert, L., Mayot, N., Bopp, L. (2018). The  
608 Mediterranean subsurface phytoplankton dynamics and their impact on Mediterranean  
609 bioregions. *Biogeosciences Discuss.*, <https://doi.org/10.5194/bg-2018-423>
- 610 Park, K., Hahm, D., Choi, J. O., Xu, S., Kim, H. C., Lee, S. H. 2019. Spatiotemporal  
611 variation in summer net community production in the Amundsen Sea Polynya: A self-  
612 organizing map analysis approach. *Continental Shelf Research*, 184, 21-29.
- 613 Park, J., Kuzminovm, F. I., Bailleul, B., Yang, E. J., Lee, S., Falkowski, P. G., Gorbunov,  
614 M. Y. 2017. Light availability rather than Fe controls the magnitude of massive  
615 phytoplankton bloom in the Amundsen Sea polynyas, Antarctica. *Limnology and*  
616 *Oceanography*, 62(5): 2260-2276.
- 617 Petrou, K., Kranz, S. A., Trimbom, S., Hassler, C. S., Ameijeiras, S. B., Sackett, O.,  
618 Ralph, P. J., Davidson, A. T. 2016. Southern Ocean phytoplankton physiology in a  
619 changing climate. *J. Plant. Physiol.* 20, 203, 135-150.
- 620 Reid, P.C., Fischer, A.C., Lewis-Brown, E., Meredith, M.P., Sparrow, M., Andersson,  
621 A.J., Antia, A., Bates, N.R., Bathmann, U., Beaugrand, G., Brix, H., Dye, S., Edwards,  
622 M., Furevik, T., Gangstø, H. á ún, H., Hopcroft, R.R., Kandall, M., Kasten, S., Keeling,  
623 R., LeQuéré, C., Mackenzie, F.T., Malin, G., Mauritzen, C., Ólafsson, J., Paull, C.,  
624 Rignot, E., Shimada, K., Vogt, M., Wallace, C., Wang, Z., Washington, R. 2009.  
625 Impacts of the oceans on climate change. *Advances in Marine Biology*, 56: 1-150
- 626 Rice, J., Gjerde, K.M., Ardrón, J., Arico, S., Cresswell, I., Escobar, E., Grant, S.,



627 Vierros, M., 2011. Policy relevance of biogeographic classification for conservation  
 628 and management of marine biodiversity beyond national jurisdiction, and the GOODS  
 629 biogeographic classification. Ocean. Coast. Manag. 54, 110e122.  
 630 <http://dx.doi.org/10.1016/j.ocecoaman.2010.10.010>

631 Ritterhoff, J., Zauke, G.P. 1997. Trace metals in field samples of zooplankton from the  
 632 Fram Strait and the Greenland Sea, Sci. Total Environ., 199, 255–270,  
 633 doi:10.1016/S0048-9697(97)05457-0

634 Roberson, L. A., Lagabriele, E., Lombard, A. T., Sink, K., Livingstone, T., Grantham,  
 635 H., Harris, J. M. 2017. Pelagic bioregionalisation using open-access data for better  
 636 planning of marine protected area networks. Ocean & Coastal Management, 148, 214-  
 637 230.

638 Schofield, O. M., Miles, T., Alderkamp, A.-C., Lee, S., Haskins, C., Rogalsky, E., et al.  
 639 2015. In situ phytoplankton distributions in the Amundsen Sea Polynya measured by  
 640 autonomous gliders. Elementa: Science of the Anthropocene, 3, 000073.

641 Sharp, B. R., Parker, S. J., Pinkerton, M., Breen, B. A., Cummings, V. J., Dunn, A.,  
 642 Grant, S. M., Hanchet, S., Keys, H. J. R., Lockhart, S. J., Lyver, P., O'Driscoll, R. L.,  
 643 Williams, M., Wilson, P. R. 2010. Bioregionalisation and Spatial Ecosystem Processes  
 644 in the Ross Sea Region. Document WG-EMM-10/30. Hobart, TAS: CCAMLR.

645 Smith, W. O., Jr., Comiso, J. C. 2008. Influence of sea ice on primary production in the  
 646 Southern Ocean, A satellite perspective. Journal of Geophysical Research, Oceans, 113,  
 647 C05S93.

648 Snelder, T. H., Leathwick, J., Dey, K., Rowden, A. A., Weatherhead, M. A., Fenwick,



649 G. D., Francis, M. P., Gorman, R. M., Grieve, J. M., Hadfield, M. G., Hewitt, J. E.,  
650 Richardson, K. M., Uddstrom, M. J., Zeldis, J. R. 2007. Development of an  
651 ecological marine classification in the New Zealand region.  
652 Environmental Management 39: 12–29  
653 Spalding, M.D., Fox, H.E., Allen, G.R., Davidson, N., FerdaNa, Z., Finlayson, M.,  
654 Halpern, B.S., Jorge, M.A., Lombana, A.L., Lourie, S.A., Martin, K.D., McManus, E.,  
655 Molnar, J., Recchia, C.A., Robertson, J. 2007. Marine ecoregions of the world: a  
656 bioregionalization of coastal and shelf areas. Bioscience 57, 573–583. [http://](http://dx.doi.org/10.1641/B570707)  
657 [dx.doi.org/10.1641/B570707](http://dx.doi.org/10.1641/B570707)  
658 Stammerjohn, S. E., Maksym, T., Lowry, K. E., Arrigo, K. R., Yuan, X., Raphael, M.,  
659 Randall-Goodwin, E., Sherrell, R. M., Yager, P. L. 2015. Seasonal sea ice changes in  
660 the Amundsen Sea, Antarctica, over the period of 1979–2014. Elementa: Science of the  
661 Anthropocene. 3: 000055.  
662 St-Laurent, P., Yager, P. L., Sherrell, R. M., Stammerjohn, S. E., Dinniman, M. S. 2017.  
663 Pathways and supply of dissolved iron in the Amundsen Sea (Antarctica). Journal of  
664 Geophysical Research: Oceans, 122(9): 7135–7162.  
665 St-Laurent, P., Yager, P. L., Sherrell, R. M., Oliver, H., Dinniman, M. S., &  
666 Stammerjohn, S. E. 2019. Modeling the Seasonal Cycle of Iron and Carbon Fluxes in  
667 the Amundsen Sea Polynya, Antarctica. Journal of Geophysical Research: Oceans,  
668 124(3), 1544–1565  
669 Swalethorp, R., Dinasquet, J., Logares, R., Bertilsson, S., Kjellerup, S., Krabberød, A.  
670 K., Moksnes, P. O., Nielsen, T. G., Riemann, L. 2019. Microzooplankton distribution

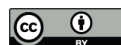

671 in the Amundsen Sea Polynya (Antarctica) during an extensive *Phaeocystis antarctica*  
672 bloom. *Progress in Oceanography*, 170, 1-10.

673 Teschke, K., Beaver, D., Bester, M. N., et al. 2016. Scientific background document in  
674 support of the development of a CCAMLR MPA in the Weddell Sea (Antarctica)—  
675 version 2016—part A: general context of the establishment of MPAs and background  
676 information on the Weddell Sea MPA planning area. CCAMLR. 2016, 1–112.

677 Trembl, E.A., Halpin, P.N., 2012. Marine population connectivity identifies ecological  
678 neighbors for conservation planning in the Coral Triangle. *Conserv. Lett.* 5, 441-449.  
679 <http://dx.doi.org/10.1111/j.1755-263X.2012.00260.x>.

680 Twilves, A. G., Goldberg, D. N., Henley, S. F., Mazloff, M. R., & Jones, D. C. 2021.  
681 Self-Shading and Meltwater Spreading Control the Transition From Light to Iron  
682 Limitation in an Antarctic Coastal Polynya. *Journal of Geophysical Research: Oceans*,  
683 126(2), 1-28.

684 Uotila, P., Goosse, H., Haines, K., Chevallier, M., Barthélemy, A., Bricaud, C., Carton,  
685 J., Fučkar, N., Garric, G., Iovino, D., Kauker, F., Korhonen, M., Lien, V. S., Marnela,  
686 M., Massonnet, F., Mignac, D., Peterson, K. A., Sadikni, R., Shi, L., Tietsche, S.,  
687 Toyoda, T., Xie, J., and Zhang, Z. 2019. An assessment of ten ocean reanalyses in the  
688 polar regions, *Clim. Dynam.*, 52, 1613–1650, [https://doi.org/10.1007/s00382-018-](https://doi.org/10.1007/s00382-018-4242-z)  
689 [4242-z](https://doi.org/10.1007/s00382-018-4242-z).

690 Venables, H. J., Clarke, A., Meredith, M. P. 2013. Wintertime controls on summer  
691 stratification and productivity at the Western Antarctic Peninsula. *Limnology and*  
692 *Oceanography*, 58:1035-1047.





693 Wu, S. Y., Hou, S. 2017. Impact of icebergs on net primary productivity in the Southern  
 694 Ocean[J], The Cryosphere, 11, 707–722, <https://doi.org/10.5194/tc-11-707-2017>  
 695 Yager, P., Sherrell, R. M., Stammerjohn, S. E., Alderkamp, A. C., Schofield, O.,  
 696 Abrahamsen, E.P., Arrigo, K.R., Bertilsson, S., Garay, D.L., Guerrero, R., Lowry, K.E.,  
 697 Moksnes, P.-O., Ndungu, K., Post, A.F., Randall-Goodwin, E., Riemann, L., Severmann,  
 698 S., Thatje, S., van Dijken, G.L., Wilson, S. 2012. ASPIRE: The Amundsen Sea Polynya  
 699 International Research Expedition. Oceanography, 25: 40–53.

700

# 701 **Tables:**

702 Table 1. Variables from GLORYS2V4 used in pelagic bioregionalization

| Physical                                       | Biological                       |
|------------------------------------------------|----------------------------------|
| Temperature ( <i>tem</i> )                     | Total Chlorophyll ( <i>chl</i> ) |
| Salinity ( <i>sal</i> )                        | Total primary production of      |
| Sea surface height ( <i>ssh</i> )              | phytoplankton ( <i>nppv</i> )    |
| Density ocean mixed layer thickness            | Dissolved Iron ( <i>fe</i> )     |
| ( <i>mlp</i> )                                 |                                  |
| Sea floor potential temperature ( <i>bot</i> ) |                                  |
| Ice concentration ( <i>fice</i> )              |                                  |

703

704

705



706

707 Table 2. Mean values of variables at different bioregions.

|                                                  | ALL    | 6-6    | 9-8    | 9-9    | 6-3    | 9-4    | 9-7        |
|--------------------------------------------------|--------|--------|--------|--------|--------|--------|------------|
| tem (K)                                          | 273.86 | 271.56 | 271.53 | 271.57 | 276.42 | 277.07 | 276.0<br>3 |
| mlp (m)                                          | 66.66  | 42.71  | 43.51  | 43.14  | 94.69  | 112.43 | 67.24      |
| ssh (m)                                          | -1.25  | -1.59  | -1.59  | -1.60  | -0.43  | -0.77  | -1.08      |
| bot (K)                                          | 273.46 | 273.34 | 274.06 | 272.97 | 273.33 | 273.32 | 273.6<br>3 |
| ice                                              | 0.59   | 0.96   | 0.97   | 0.95   | 0.12   | 0.05   | 0.20       |
| sal                                              | 33.65  | 33.22  | 33.31  | 33.19  | 33.92  | 33.99  | 33.86      |
| chl (mg m <sup>-3</sup> )                        | 0.38   | 0.72   | 0.57   | 0.76   | 0.33   | 0.32   | 0.36       |
| nppv (mgC<br>m <sup>-3</sup> day <sup>-1</sup> ) | 3.64   | 8.01   | 5.86   | 8.51   | 2.99   | 3.12   | 3.19       |
| fe (mmol m-<br>3)                                | <0.001 | 0.002  | 0.001  | 0.003  | <0.001 | <0.001 | <0.00<br>1 |
| depth (m)                                        | -3000  | -144   | -295   | -86    | -4448  | -3276  | -4613      |

708

709

710

711

712



713

714 **Figures**

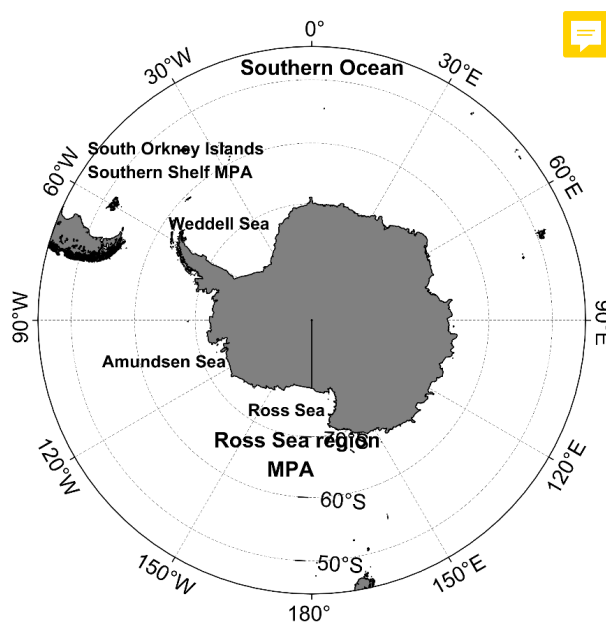

715

716 **Figure 1.** Locations of the Southern Ocean, Weddell Sea, Rose Sea, and Amundsen Sea

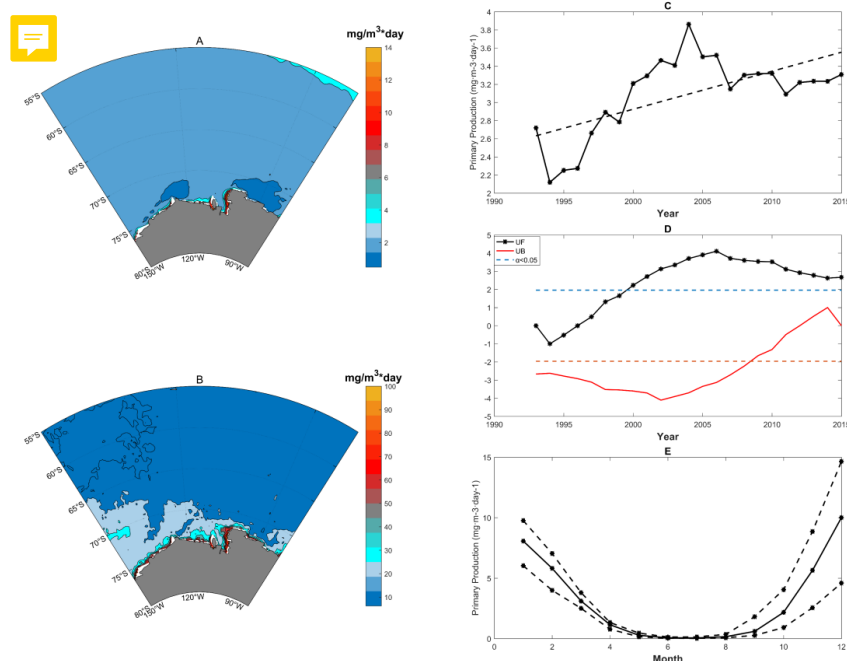

717

718 **Figure 2.** Primary production in the Amundsen Sea, (A) mean value of primary  
 719 production; (B) seasonality amplitude of primary production; (C) annual values of  
 720 (black line) and long-term changes in (black dashed line) primary production; (D) MK-  
 721 values (y-axes) obtained from the sequential Mann-Kendall test against time for annual  
 722 primary production; (E) monthly primary production values (black line) and amplitudes  
 723 of the monthly values (black broken line).

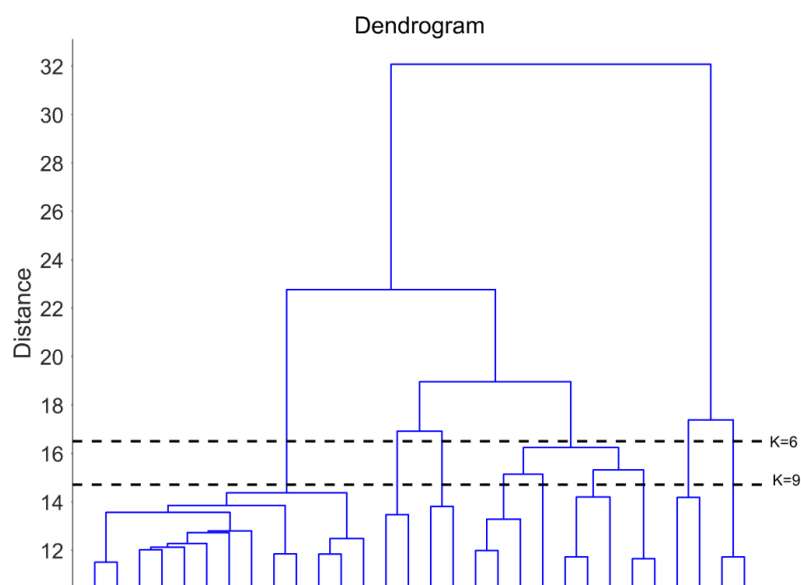

724

725 **Figure 3.** Dendrogram obtained from hierarchical clustering. The dotted lines ( $K=6$  and

726  $K=9$ ) show the levels at which the dendrogram was cut to produce the groups.

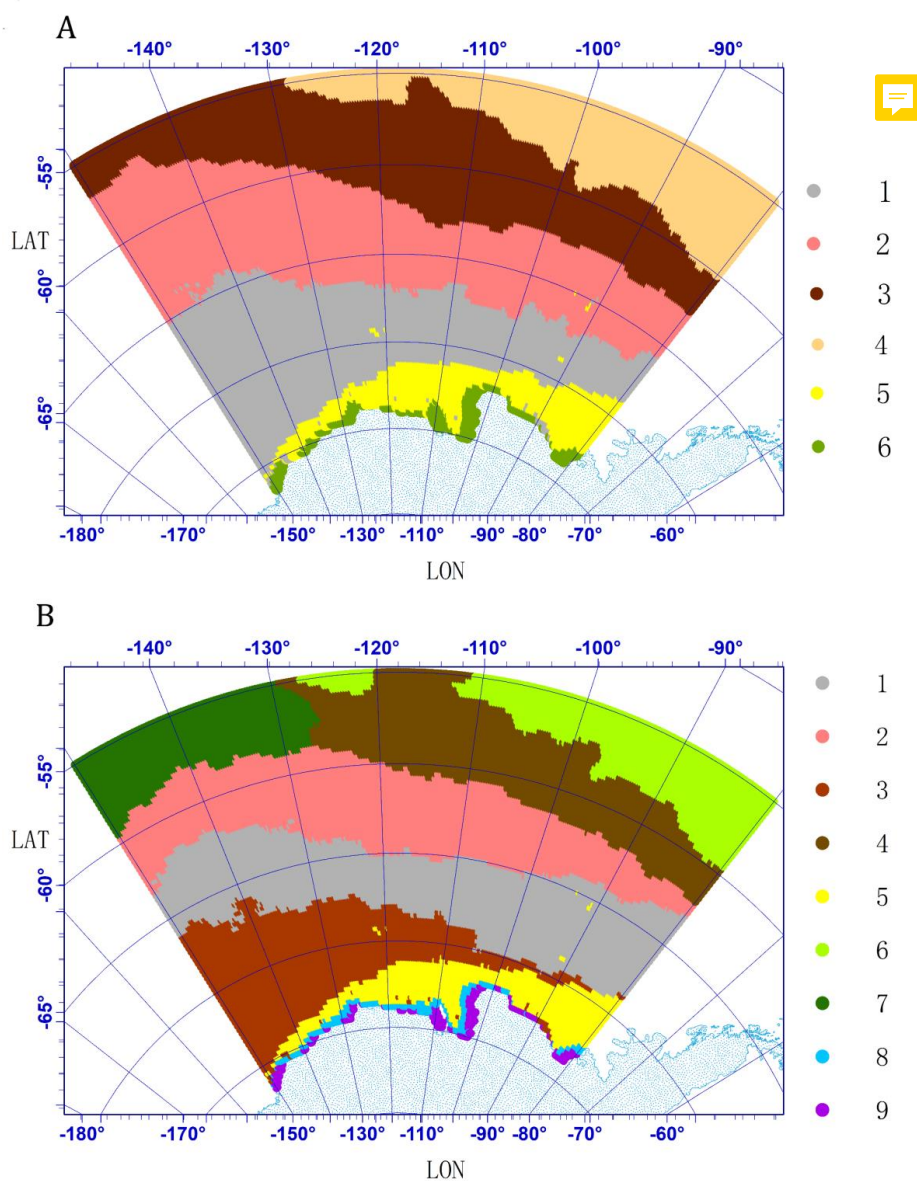

727

728 **Figure 4.** Six bioregions identified in the *K*-means cluster analysis (A); 9 bioregions

729 identified in the *K*-means cluster analysis (B)

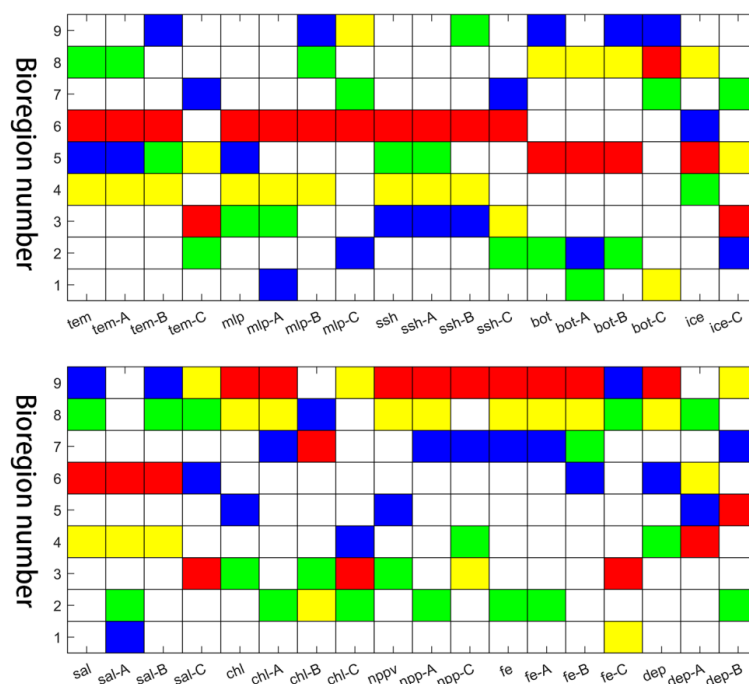

730

731 **Figure 5.** Parameters that characterize the key properties of bioregions, showing the  
 732 maximum value (red), the second-highest value (yellow), the minimum value (blue)  
 733 and the second-lowest value (green) of each parameter, including the annual maximum  
 734 mean (A), annual minimum mean (B), and long-term change rate (C) (dep-A: latitudinal  
 735 gradient, dep-B: longitudinal gradient)

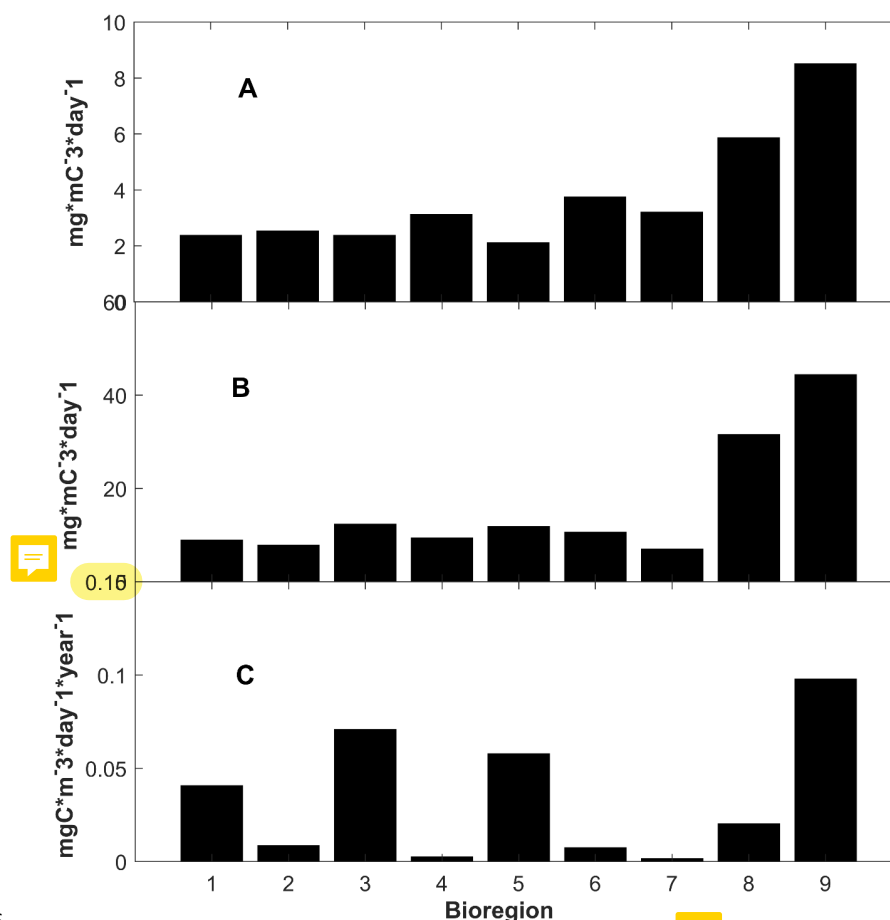

736  
 737 **Figure 6.** Mean values (A), annual maximum mean values (B), and long-term change  
 738 rates (C) of primary production in 9 bioregions.



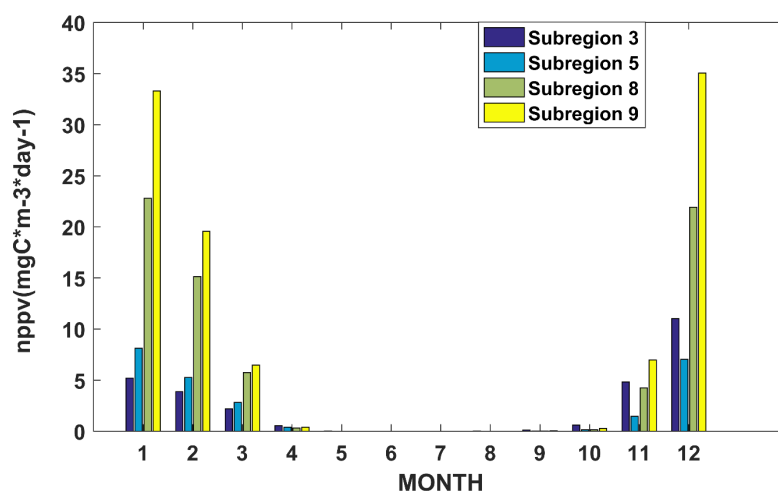

739

740 **Figure 7.** Monthly mean net primary productivity values in bioregions 3, 5, 8, and 9

741 from 1993 to 2015

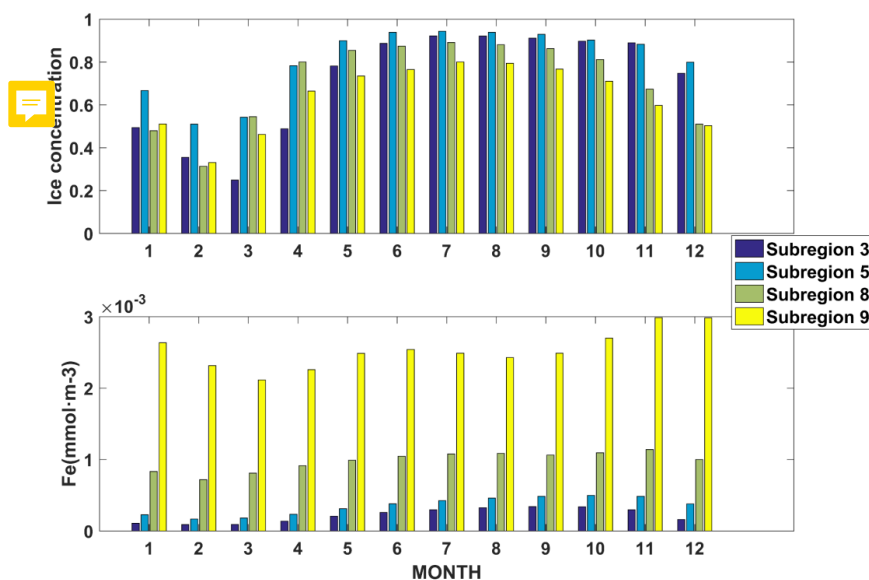

742

743 **Figure 8.** Monthly mean ice concentration and dissolved iron in bioregions 3, 5, 8, and

744 9 from 1993 to 2015.

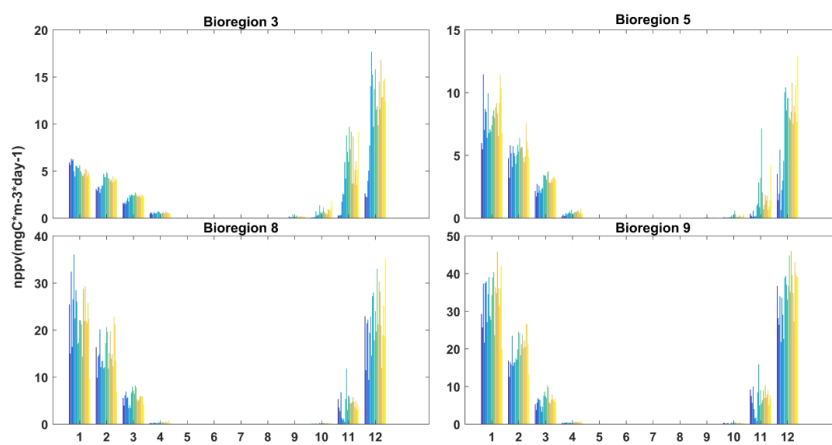

745

746 **Figure 9.** Changes in monthly net primary productivity values in bioregions 3, 5, 8,

747 and 9 from 1993 to 2015 (the colors represent different years)

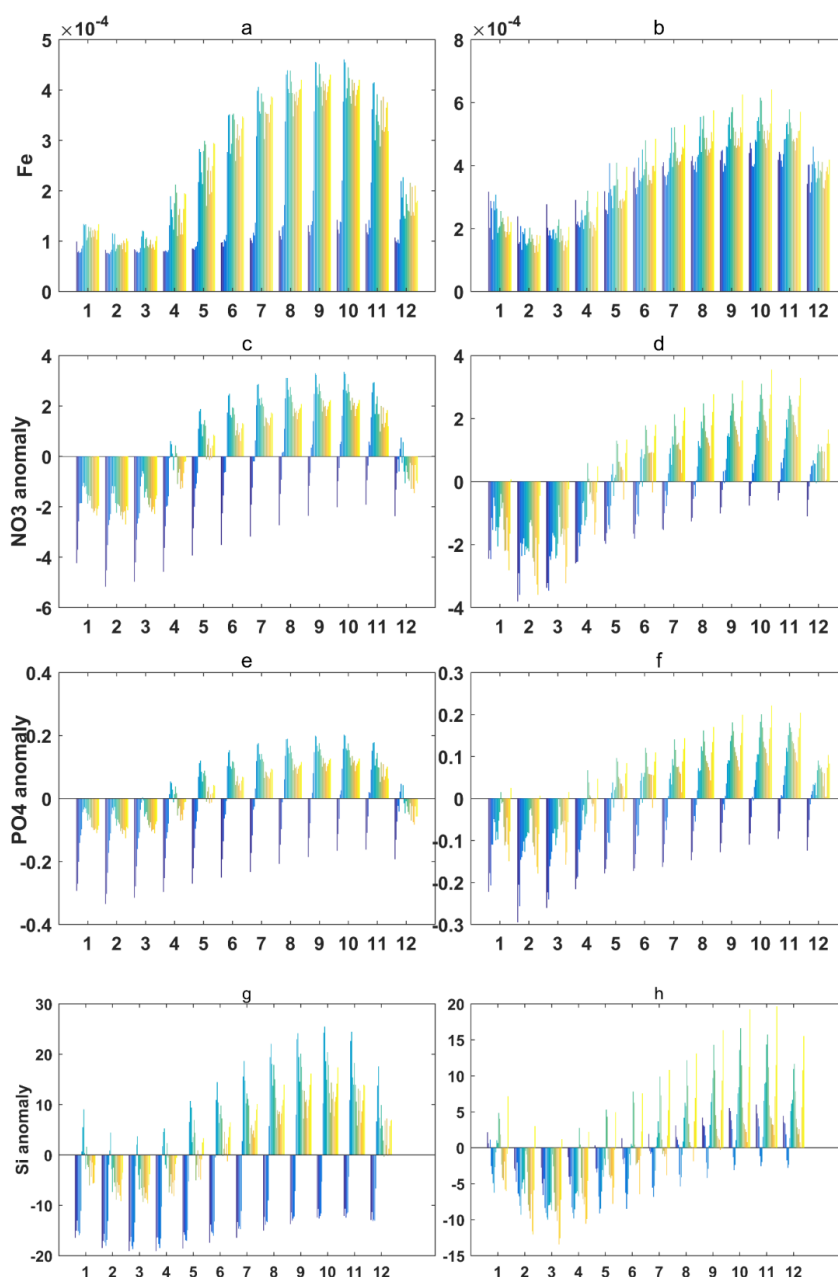

748

749 **Figure 10.** Changes in monthly Fe values in bioregions 3 (a) and 5 (b) from 1993 to  
 750 2015; changes in monthly nitrate anomalies in bioregions 3 (c) and 5 (d); changes in  
 751 monthly phosphate anomalies in bioregions 3 (e) and 5 (f); and changes in monthly



752 silicate anomalies in bioregions 3 (g) and 5 (h)

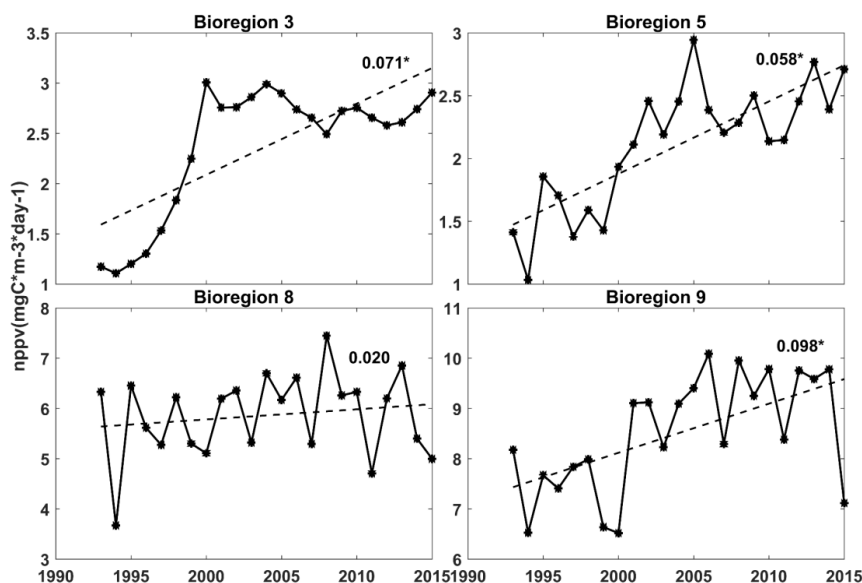

753

754 **Figure. 11.** Annual net primary productivity rates (full line) in bioregions 3, 5, 8 and 9

755 from 1993 to 2015, the dotted lines indicate the linear trends (numbers are the change

756 rates).

757
